# Supplementary material for: Preparation and Preliminary Nonlinear Optical Properties of BiFeO3 Nanocrystal Suspensions from a Simple, Chelating Agent-Free Precipitation Route
Source: Hindawi journal article supplement (doi:10.1155/2018/3019586), 2018-09-09
Supplement: f1 [file 3019586.f1.docx]

Supplementary Material

Preparation and preliminary non-linear optical properties of BiFeO3 nanocrystal suspensions from a simple, chelating agent-free precipitation route

Théo Tytus, Oisín Phelan, Mathias Urbain, Gareth Clarke, Jérémy Riporto, Ronan Le Dantec, Gnon Djanta, Sandrine Beauquis, Virginie Monnier, Yann Chevolot, Christine Galez, Yannick Mugnier

Additional XRD results

Figure S1. XRD patterns in the low 2 region showing the effect of a rapid / slow addition of a 4M KOH solution on the final impurity content: (blue) quick pouring of the acid precursor solution into KOH, (black) drop wise addition of the KOH solution into the acid precursor one and (green) slow addition of KOH from a burette. Peaks belonging to the Bi25FeO39 (light gray square) are clearly more present when the acid precursor solution is quickly poured into KOH.

Figure S2. Zoom in the low 2 region of a FullProf refinement with the *Le Bail* procedure (without structural model) applied to the XRD profile for the sample precipitated at 3M of KOH. The excluded region at 45° is due to a parasitic reflection arising from the Al sample holder.


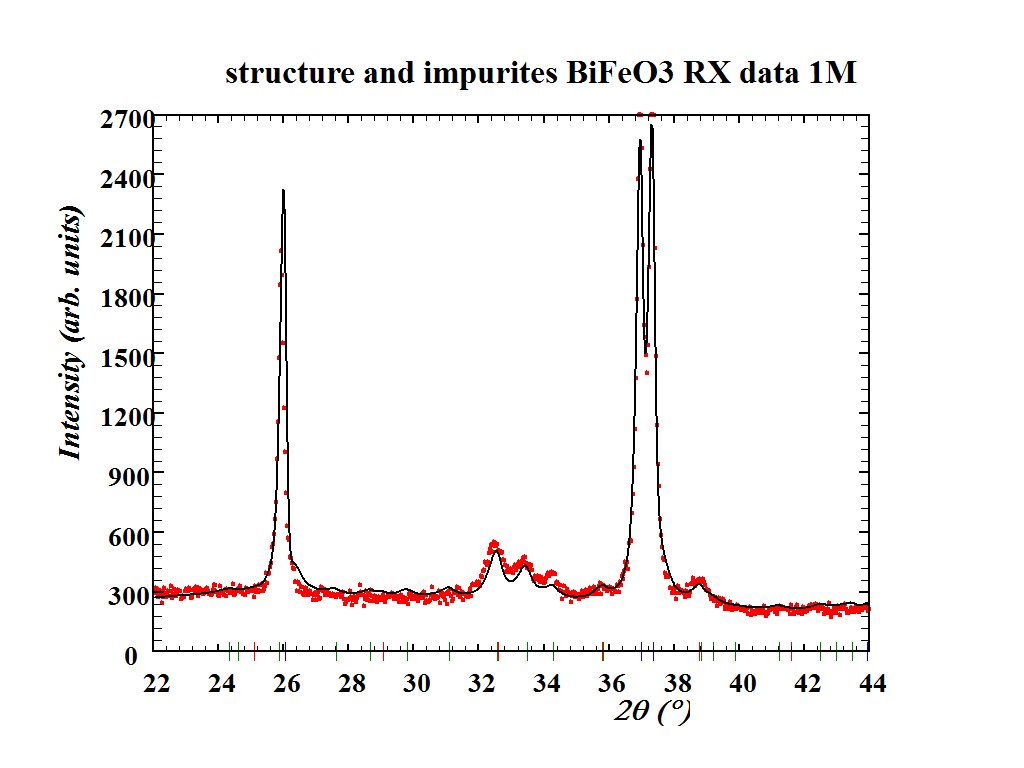


Figure S3. Representative FullProf refinements including structural models of the BiFeO3,Bi25FeO39 and Bi2Fe4O9 phases for the two most impure samples obtained from an initial KOH content at 1M and 12M.

Figure S4. XRD patterns of 20mg BiFeO3 samples depending on the initial amount of KOH and after 3min of annealing at 720°C in a 1.5 mm thick alumina (round) crucible. Peaks denoted as * belong to the presence of the trigonal metal Bi phase (ICSD#64703) whereas light gray squares and open circles correspond to Bi25FeO39 and to the orthorhombic goethite FeO(OH) phase (ICSD#71808), respectively. The BiFeO3 reference profile (ICSD#15299) is shown in red at the bottom of the graph. Inset: Mean crystallite size derived from the (012) reflection at ~26.3° and the Scherrer’s formulae after correction of the instrumental broadening.

Figure S5. XRD patterns of 40 mg BiFeO3 samples depending on the initial amount of KOH and after 4min of annealing at 720°C in a larger, 4cm-long, alumina (flat) crucible. Peaks denoted as * belong to the presence of the trigonal metal Bi phase (ICSD#64703) whereas light gray squares and open circles correspond to Bi25FeO39 and to the orthorhombic goethite FeO(OH) phase (ICSD#71808), respectively. The BiFeO3 reference profile (ICSD#15299) is shown in red at the bottom of the graph.

Figure S6. XRD pattern of a 200mg BiFeO3 sample at 4 M of KOH after 4min of annealing at 720°C in the large alumina (flat) crucible.

Figure S7. XRD pattern of amorphous precursors precipitated at 4M of KOH only showing diffraction peaks arising from the Al sample holder.
